# Supplementary material for: USDA Special Supplemental Nutrition Program for Women, Infants and Children (WIC) Vendor Criteria: An Examination of US Administrative Agency Variations
Source: MDPI journal article supplement (doi:10.3390/ijerph18073545), 2021-03-29
Supplement: s1 [file s1]

# Special Supplemental Nutrition Program for Women, Infants and Children (WIC) Vendor Criteria: An Examination of US Administrative Agency Variations

## Supplemental Tables

**Supplemental Table 1: Minimum Federal Requirements for Administrative Agency-enacted WIC Vendor Selection and Authorization Criteria, 2018–2020 <sup>1</sup>**

| Requirement Category                                            | Requirement Summary                                                                                                                                                                       |
|-----------------------------------------------------------------|-------------------------------------------------------------------------------------------------------------------------------------------------------------------------------------------|
| Minimum variety and quantity of supplemental foods <sup>2</sup> | A vendor must stock two different fruits, two different vegetables, and at least one whole grain cereal.                                                                                  |
| Business integrity                                              | A vendor may not be authorized if it has been convicted of an activity indicating lack of business integrity.                                                                             |
| Current SNAP disqualification                                   | A vendor may not be currently disqualified from SNAP.                                                                                                                                     |
| Provision of incentive items                                    | An above-50 percent vendor may not be authorized if it provides incentives on prohibited items.                                                                                           |
| Competitive price                                               | Vendors are required to participate in established peer groups that create competitive pricing and allowable reimbursable levels, and that also consider participants' geographic access. |

<sup>1</sup> Adapted from Code of Federal Regulations, 7 CFR § 246.12(g)(3) and (g)(4) (2020).  
<sup>2</sup> “Supplemental Foods” used in the Code of Federal Regulations; this paper uses “WIC-approved foods” for clarity.

# Special Supplemental Nutrition Program for Women, Infants and Children (WIC) Vendor Criteria: An Examination of US Administrative Agency Variations

Supplemental Tables

| Supplemental Table 2: U.S. Territories Administratively Operating WIC Programs, 2018–2020 |                                               |
|-------------------------------------------------------------------------------------------|-----------------------------------------------|
| U.S. Territories ( <i>n</i> = 5)                                                          | WIC Vendor Documents Available for Extraction |
| American Samoa                                                                            | No                                            |
| Guam                                                                                      | Yes                                           |
| Northern Mariana Islands (Commonwealth of)                                                | Yes                                           |
| Puerto Rico                                                                               | Yes                                           |
| U.S. Virgin Islands                                                                       | No                                            |

# Special Supplemental Nutrition Program for Women, Infants and Children (WIC) Vendor Criteria: An Examination of US Administrative Agency Variations

## Supplemental Tables

**Supplemental Table 3: Indian Tribal Organizations (ITOs) Administratively Operating WIC Programs, 2018–2020**

| U.S. ITOs ( <i>n</i> = 33)          | State in Which ITO is Located | WIC Vendor Documents Available for Extraction |
|-------------------------------------|-------------------------------|-----------------------------------------------|
| Acoma, Canoncito, & Laguna          | New Mexico                    | Yes                                           |
| Cherokee Nation                     | Oklahoma                      | No                                            |
| Cheyenne River Sioux                | South Dakota                  | No                                            |
| Chickasaw Nation                    | Oklahoma                      | No                                            |
| Choctaw Indians                     | Mississippi                   | No                                            |
| Choctaw Nation                      | Oklahoma                      | Yes                                           |
| Citizen Potawatomi Nation           | Oklahoma                      | Yes                                           |
| Eastern Cherokee                    | North Carolina                | No                                            |
| Eight Northern Pueblos              | New Mexico                    | No                                            |
| Five Sandoval Pueblos               | New Mexico                    | No                                            |
| Indian Township                     | Maine                         | No                                            |
| Inter-Tribal Council                | Arizona                       | Yes                                           |
| Inter-Tribal Council                | Nevada                        | Yes                                           |
| Inter-Tribal Council                | Oklahoma                      | Yes                                           |
| Isleta Pueblo                       | New Mexico                    | Yes                                           |
| Muscogee Creek Nation               | Oklahoma                      | Yes                                           |
| Navajo Nation                       | Arizona                       | No                                            |
| Northern Arapahoe                   | Wyoming                       | No                                            |
| Omaha Sioux                         | Nebraska                      | No                                            |
| Osage Tribal Council                | Oklahoma                      | Yes                                           |
| Otoe-Missouria Tribe                | Oklahoma                      | Yes                                           |
| Pleasant Point                      | Maine                         | Yes                                           |
| Rosebud Sioux                       | South Dakota                  | No                                            |
| San Felipe Pueblo                   | New Mexico                    | Yes <sup>a</sup>                              |
| Santee Sioux                        | Nebraska                      | No                                            |
| Santo Domingo Tribe                 | New Mexico                    | Yes <sup>a</sup>                              |
| Shoshone Tribe                      | Wyoming                       | No                                            |
| Standing Rock Sioux Tribe           | North Dakota                  | No                                            |
| Three Affiliated Tribes             | North Dakota                  | Yes                                           |
| Ute Mountain Ute Tribe              | Colorado                      | No                                            |
| Wichita, Caddo, and Delaware Tribes | Oklahoma                      | Yes                                           |
| Winnebago Tribe                     | Nebraska                      | No                                            |
| Zuni Pueblo                         | New Mexico                    | No                                            |

<sup>a</sup> ITOs were defined as ‘direct distribution’ meaning that the ITO provides WIC foods directly to participants without using a vendor in a retail setting.

# Special Supplemental Nutrition Program for Women, Infants and Children (WIC) Vendor Criteria: An Examination of US Administrative Agency Variations

## Supplemental Tables

**Supplemental Table 4: State-by-State Numbers of WIC Vendor Selection and Authorization Criteria Adopted by State Agencies, 2018–2020**

| State          | Number of Vendor Selection and Authorization Criteria | State          | Number of Vendor Selection and Authorization Criteria |
|----------------|-------------------------------------------------------|----------------|-------------------------------------------------------|
| Oklahoma       | 2                                                     | Texas          | 7                                                     |
| Ohio           | 3                                                     | Vermont        | 7                                                     |
| Tennessee      | 3                                                     | Wisconsin      | 7                                                     |
| North Carolina | 4                                                     | Delaware       | 8                                                     |
| South Carolina | 4                                                     | Iowa           | 8                                                     |
| Maryland       | 5                                                     | Louisiana      | 8                                                     |
| Minnesota      | 5                                                     | Maine          | 8                                                     |
| Oregon         | 5                                                     | Massachusetts  | 8                                                     |
| Rhode Island   | 5                                                     | Mississippi    | 8                                                     |
| Arkansas       | 6                                                     | Missouri       | 8                                                     |
| Colorado       | 6                                                     | Nevada         | 8                                                     |
| Indiana        | 6                                                     | New Hampshire  | 8                                                     |
| Kentucky       | 6                                                     | Pennsylvania   | 8                                                     |
| New Mexico     | 6                                                     | South Dakota   | 8                                                     |
| North Dakota   | 6                                                     | Wyoming        | 8                                                     |
| Virginia       | 6                                                     | Alabama        | 9                                                     |
| Alaska         | 7                                                     | Idaho          | 9                                                     |
| California     | 7                                                     | Nebraska       | 9                                                     |
| Connecticut    | 7                                                     | New Jersey     | 9                                                     |
| Florida        | 7                                                     | Utah           | 9                                                     |
| Illinois       | 7                                                     | Arizona        | 10                                                    |
| Kansas         | 7                                                     | Georgia        | 10                                                    |
| Michigan       | 7                                                     | Hawaii         | 10                                                    |
| Montana        | 7                                                     | Washington     | 10                                                    |
| New York       | 7                                                     | West Virginia  | 10                                                    |
|                |                                                       | Washington, DC | 11                                                    |
